# Supplementary material for: Successful CO2 reduction under visible light photocatalysis using porous NiO nanoparticles, an atypical metal oxide
Source: Royal Society of Chemistry journal article supplement (doi:10.1039/d2nj00324d), 2022-01-01
Supplement: d2nj00324d1.pdf [file d2nj00324d1.pdf]

Successful CO<sub>2</sub> reduction under visible light photocatalysis using porous NiO  
nanoparticles, an atypical metal oxide

Atanu Sahoo,<sup>a</sup> Arpita Hazra Chowdhury,<sup>b,c</sup> Sk. Manirul Islam,<sup>b\*</sup> and Tanushree Bala<sup>a\*</sup>

Supporting information SI-1

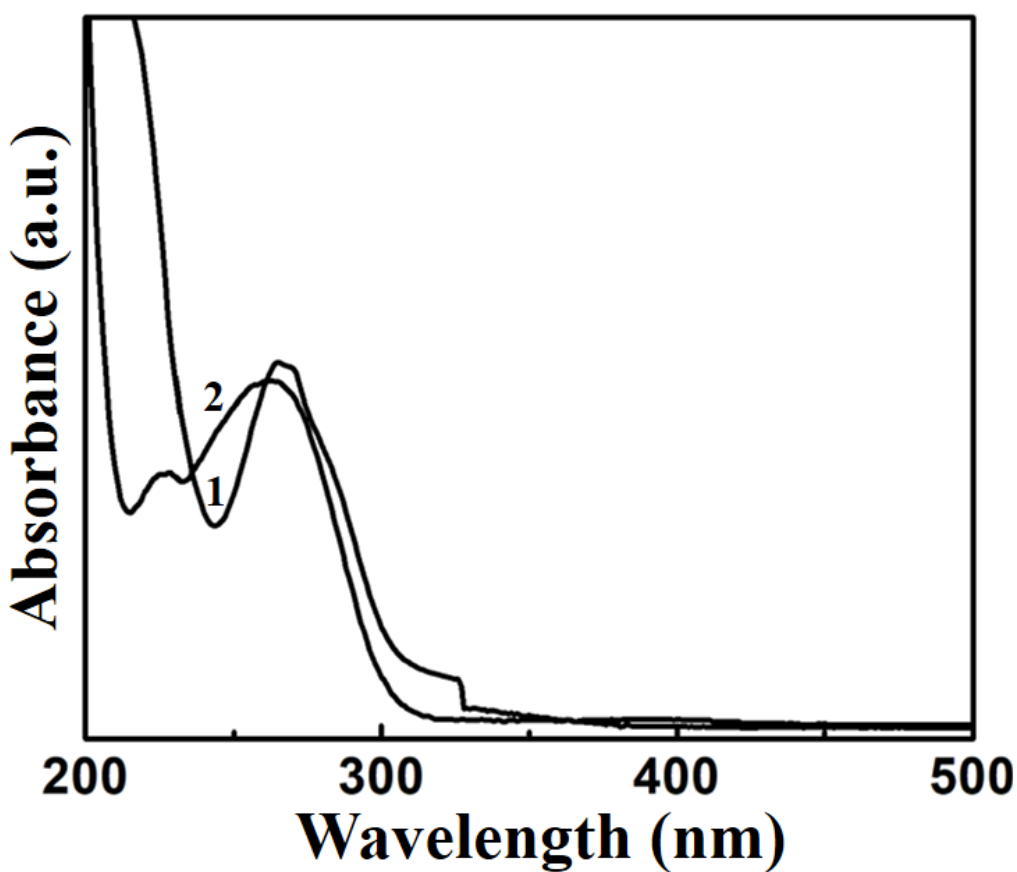

Figure SI-1. Curve 1) UV-Vis spectrum of formaldehyde. Curve 2) UV- Vis spectrum of the product.

## Supporting Information SI-2

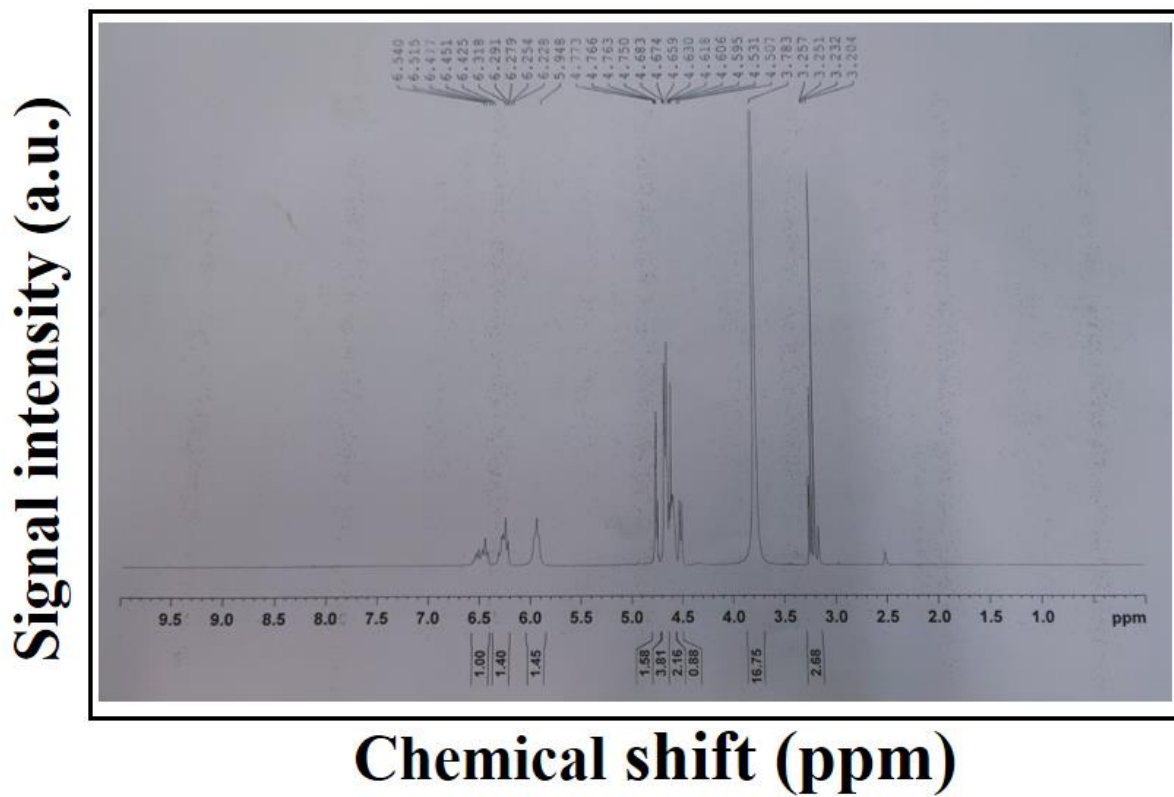

Figure SI-2.  $^1\text{H}$  NMR spectrum of the product.

Supporting information SI-3

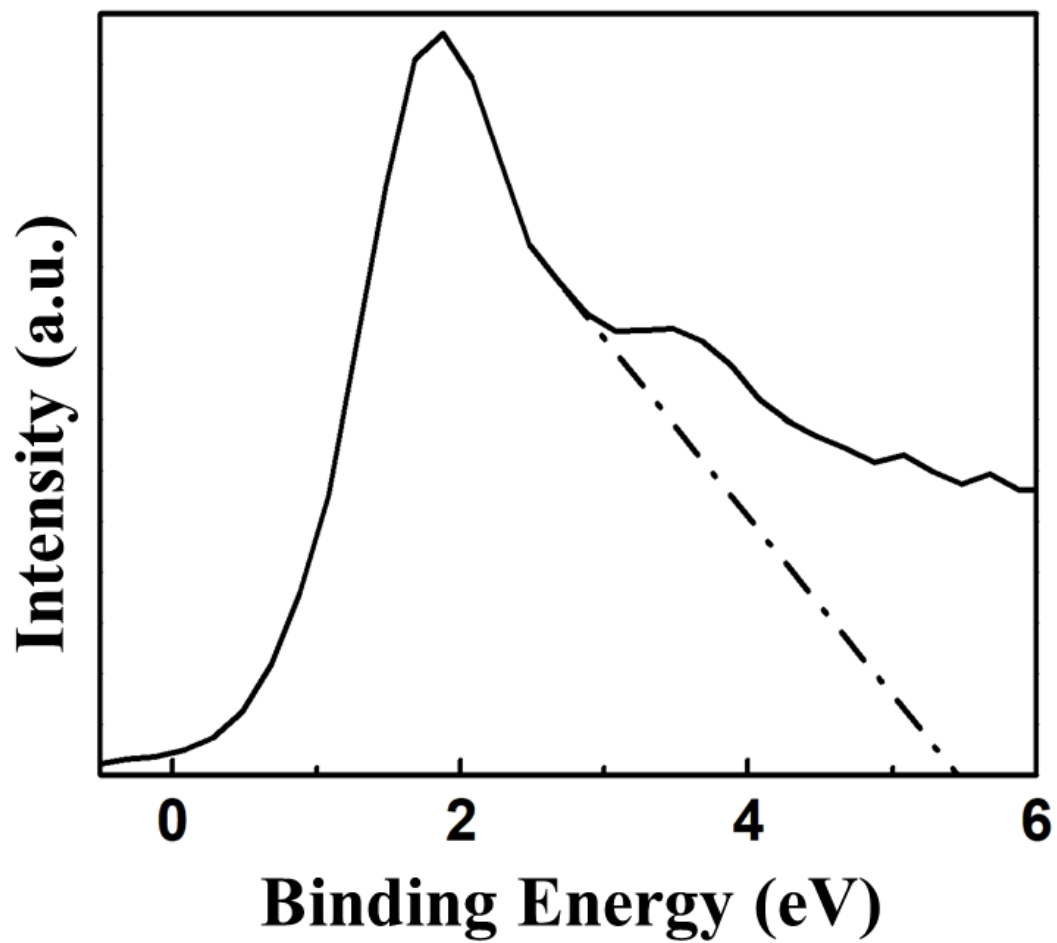

Figure SI-3. Valance band xps spectra of NiO nanoparticle.

Supporting Information SI-4

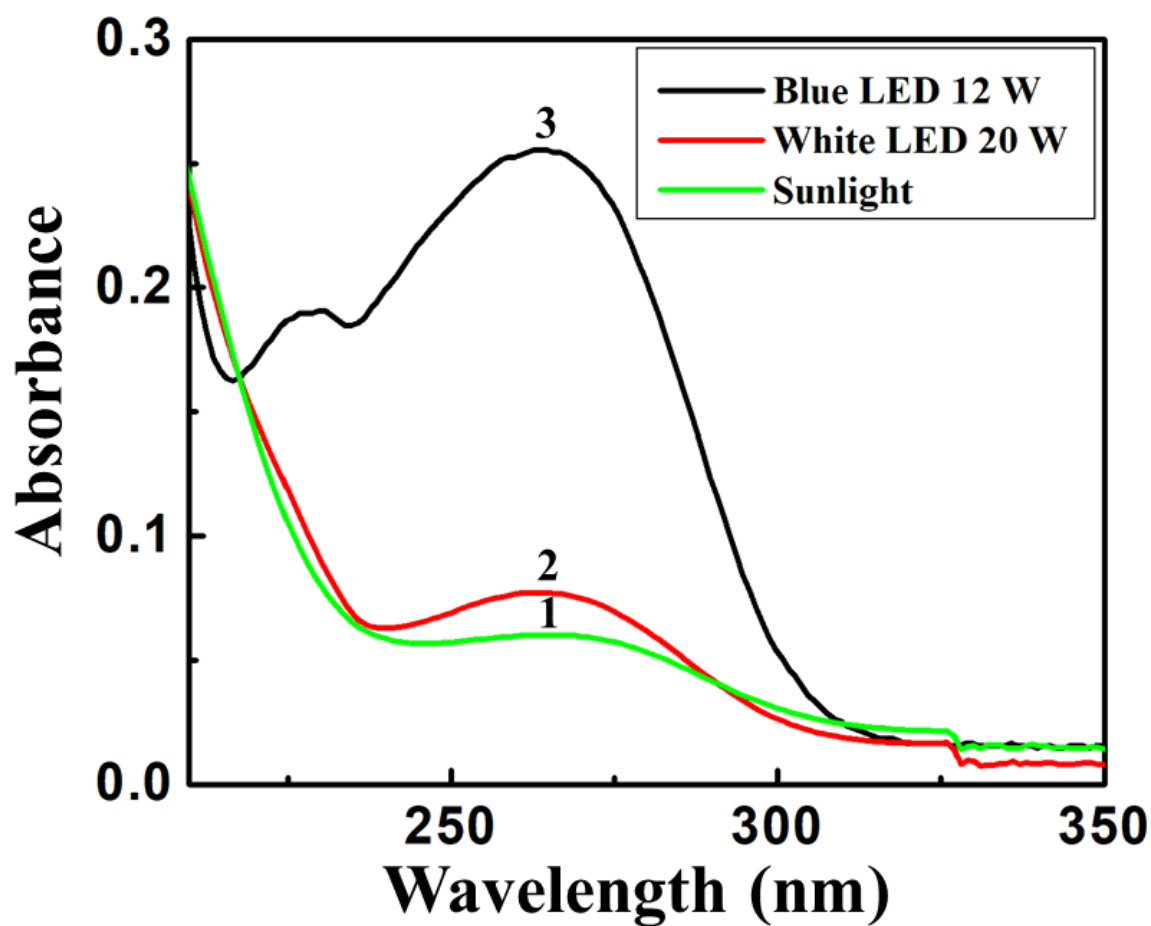

Figure SI-4. UV-Vis spectrum of HCHO in H<sub>2</sub>O with variable light sources. Curve 1) Irradiation by sunlight. Curve 2) Irradiation by 20 W white LED and Curve 3) Irradiation by 12 W blue LED

Supporting information SI-5

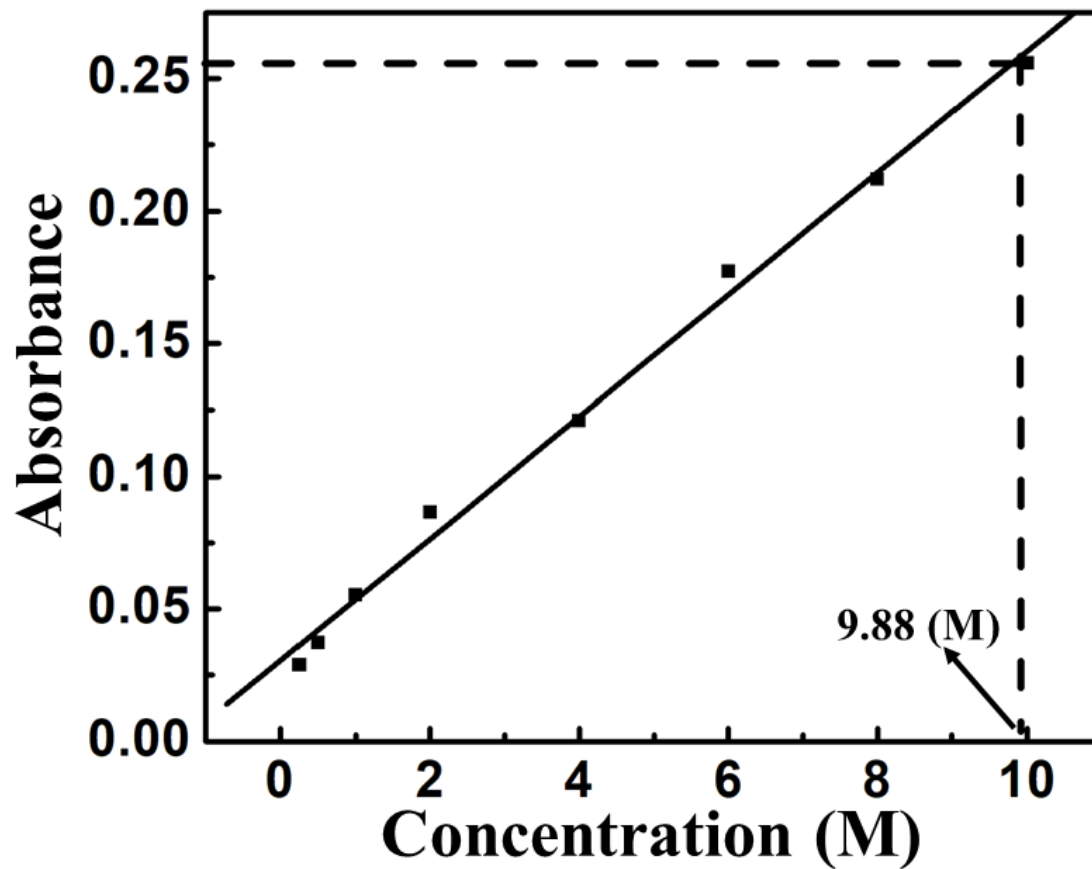

Figure SI-5. Calibration curve of formaldehyde.

Supporting information SI-6

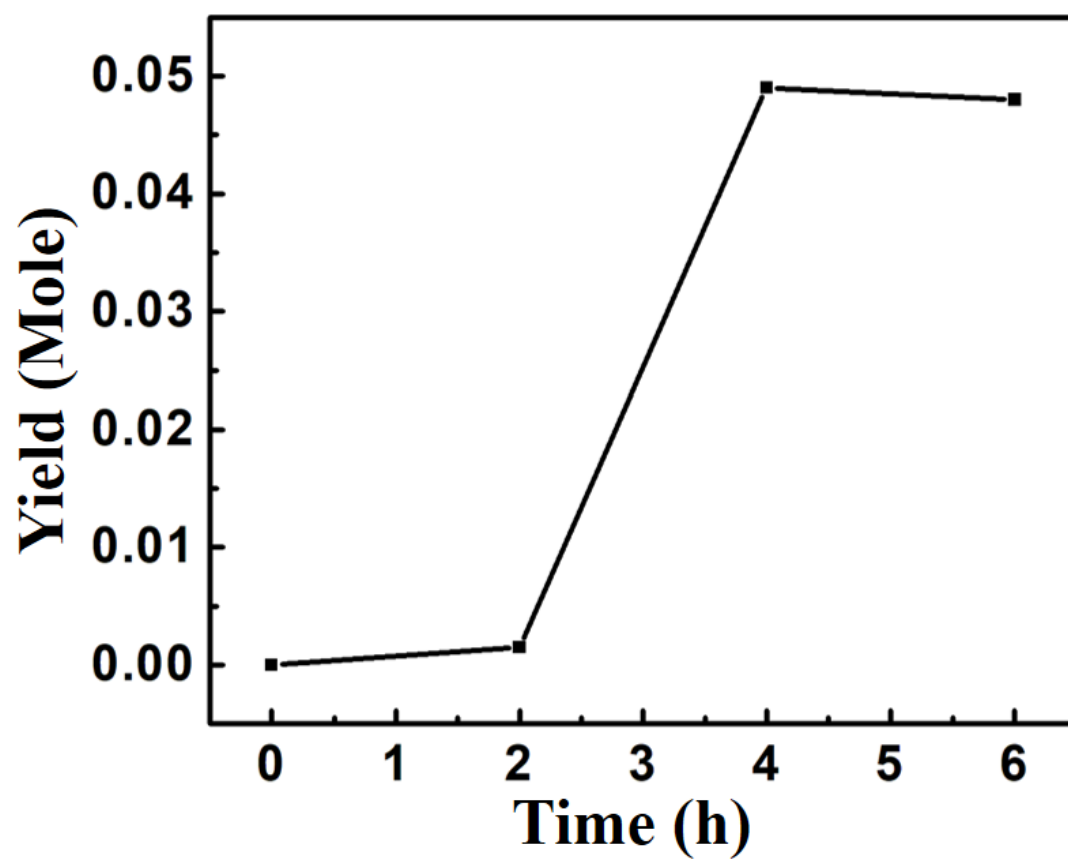

Figure SI-6. Kinetics plot of the product

Supporting information SI-7

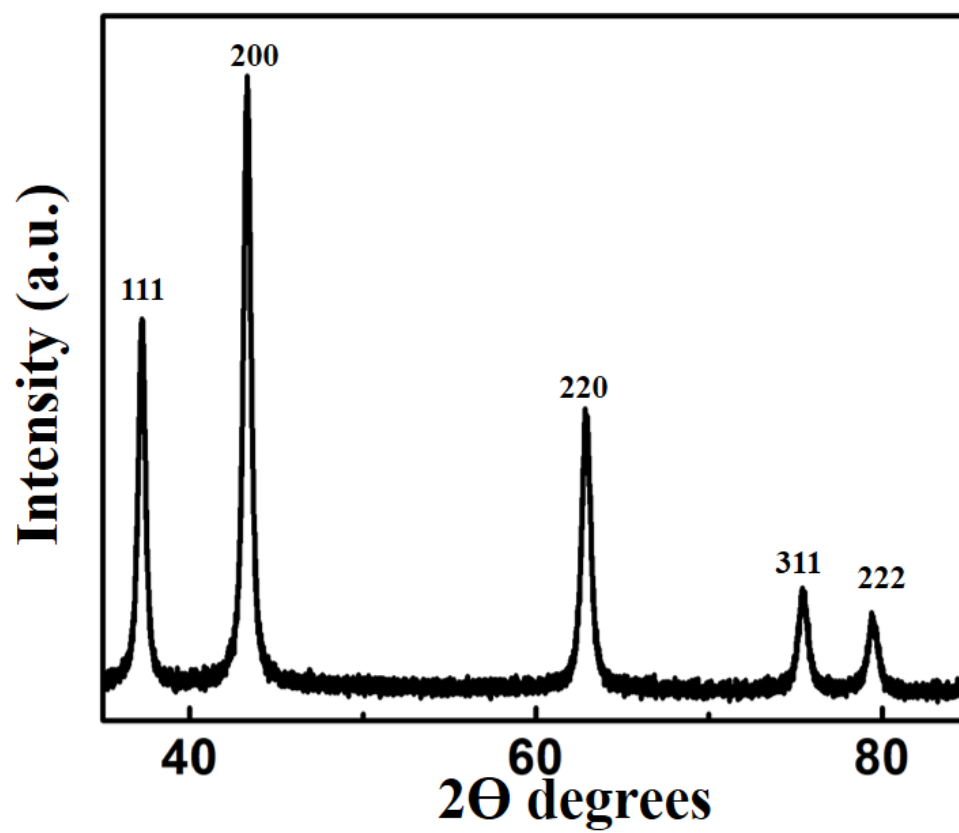

**Figure SI-7.** PXRD of the used catalyst.

Supporting information SI-8

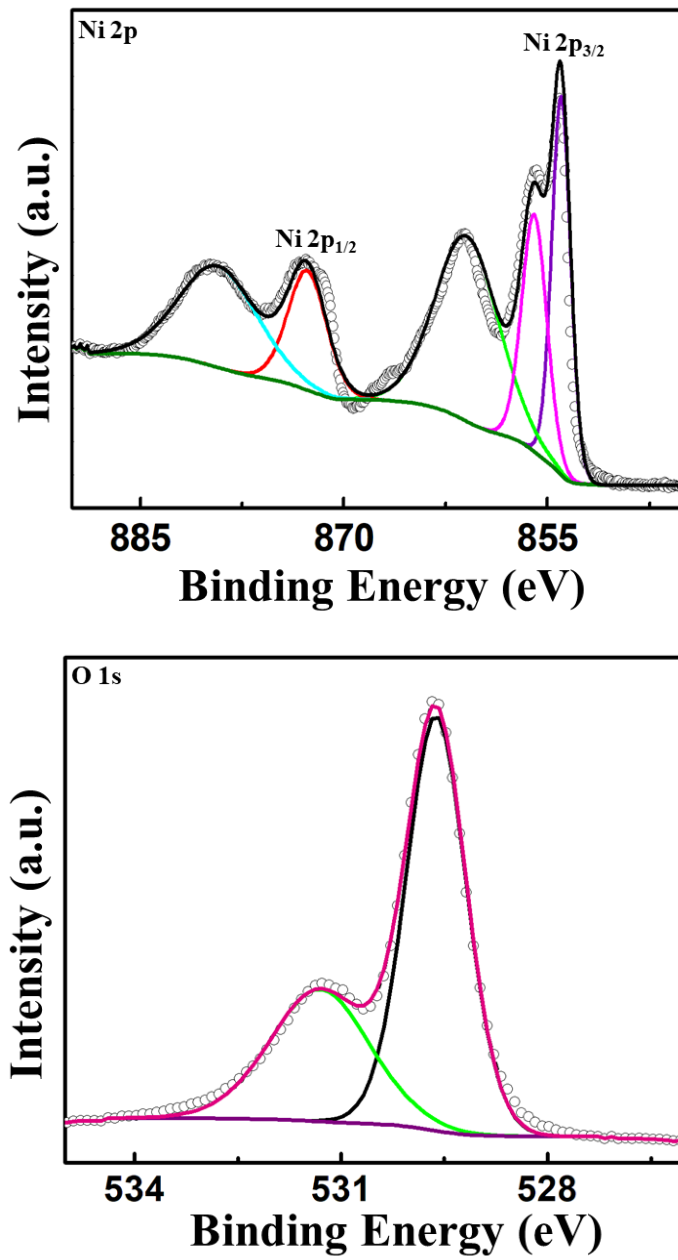

**Figure SI-8.** XPS of Ni 2p and O1s from the used catalyst.



Supporting information SI-9

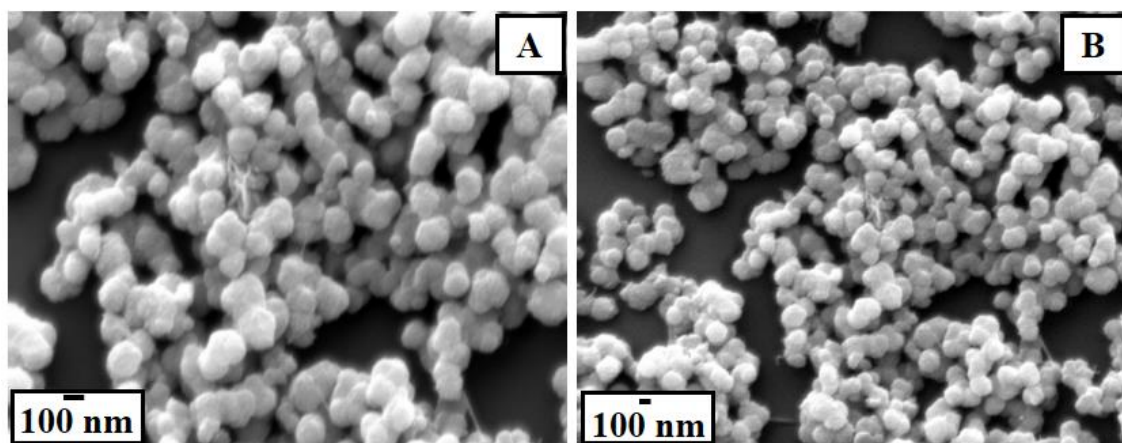

**Figure SI-9.** SEM images of the used catalyst.

### Supporting information SI-10

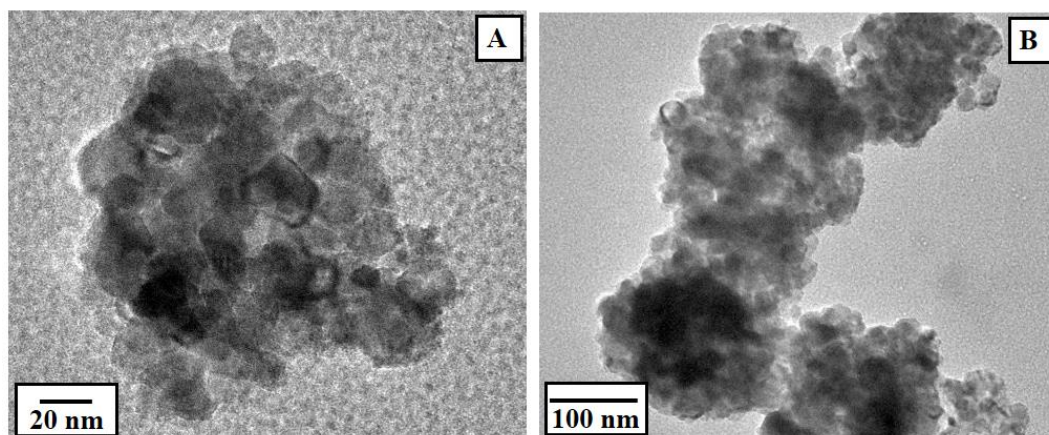

**Figure SI-10.** TEM images of the used catalyst.
